# Supplementary material for: Design, Synthesis, and Biological Evaluation of a Novel [18F]-Labeled Arginine Derivative for Tumor Imaging
Source: MDPI journal article supplement (doi:10.3390/ph16101477), 2023-10-16

## Supplemental Information

### Design, synthesis and biological evaluation of a novel [ $^{18}\text{F}$ ]-labeled arginine derivative for tumor imaging

|    |                                                  |   |
|----|--------------------------------------------------|---|
| 1. | Synthesis.....                                   | 2 |
| 2. | Radiolabeling and <i>in vitro</i> stability..... | 2 |
| 3. | MicroPET-CT imaging.....                         | 3 |
| 4. | NMR of compound.....                             | 4 |

## 1. Synthesis.

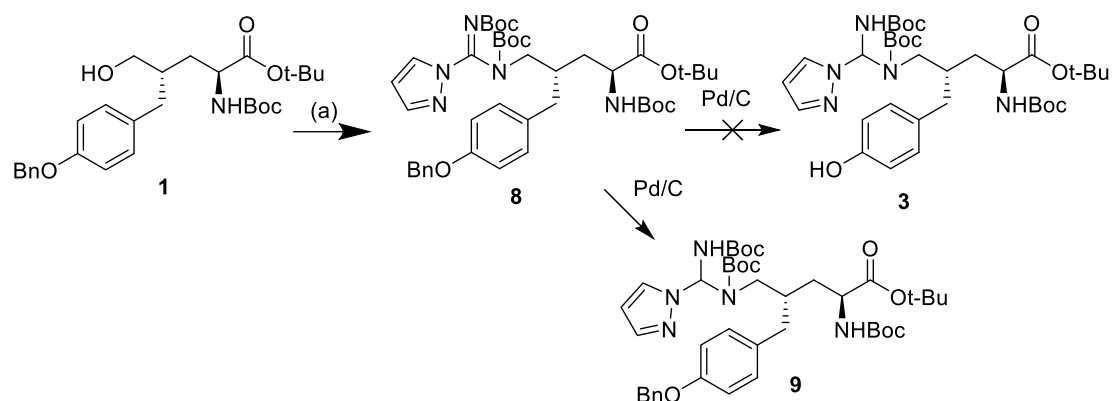

**Scheme S1.** The initial route for synthesizing compound **3**. (a) N,N'-Di-Boc-1H-pyrazole-1-carboxamide, triphenyl phosphine, diethyl azodicarboxylate, THF, 0 °C - rt, overnight.

## 2. Radiolabeling and *in vitro* stability

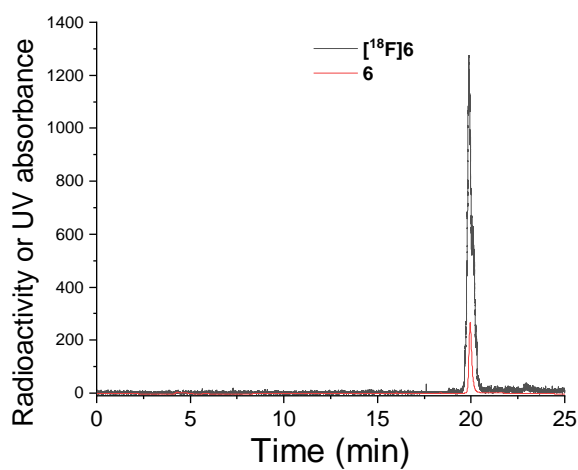

**Figure S1.** HPLC profiles of "cold" **6** and [<sup>18</sup>F]**6**.

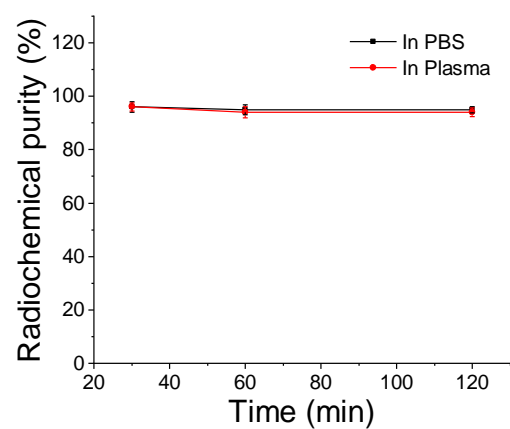

**Figure S2.** The stability in PBS and plasma of  $[^{18}\text{F}]7$ .

### 3. MicroPET-CT imaging.

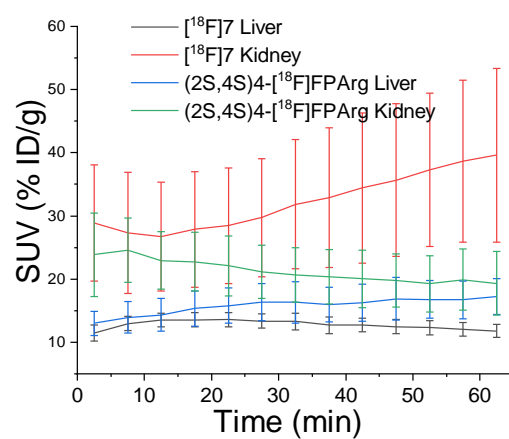

**Figure S3.** Time-activity curves of (2S,4S)4- $[^{18}\text{F}]$ FPArg and  $[^{18}\text{F}]7$  uptake in liver and kidney of U87MG tumor-bearing nude mice.

#### 4. NMR of compound

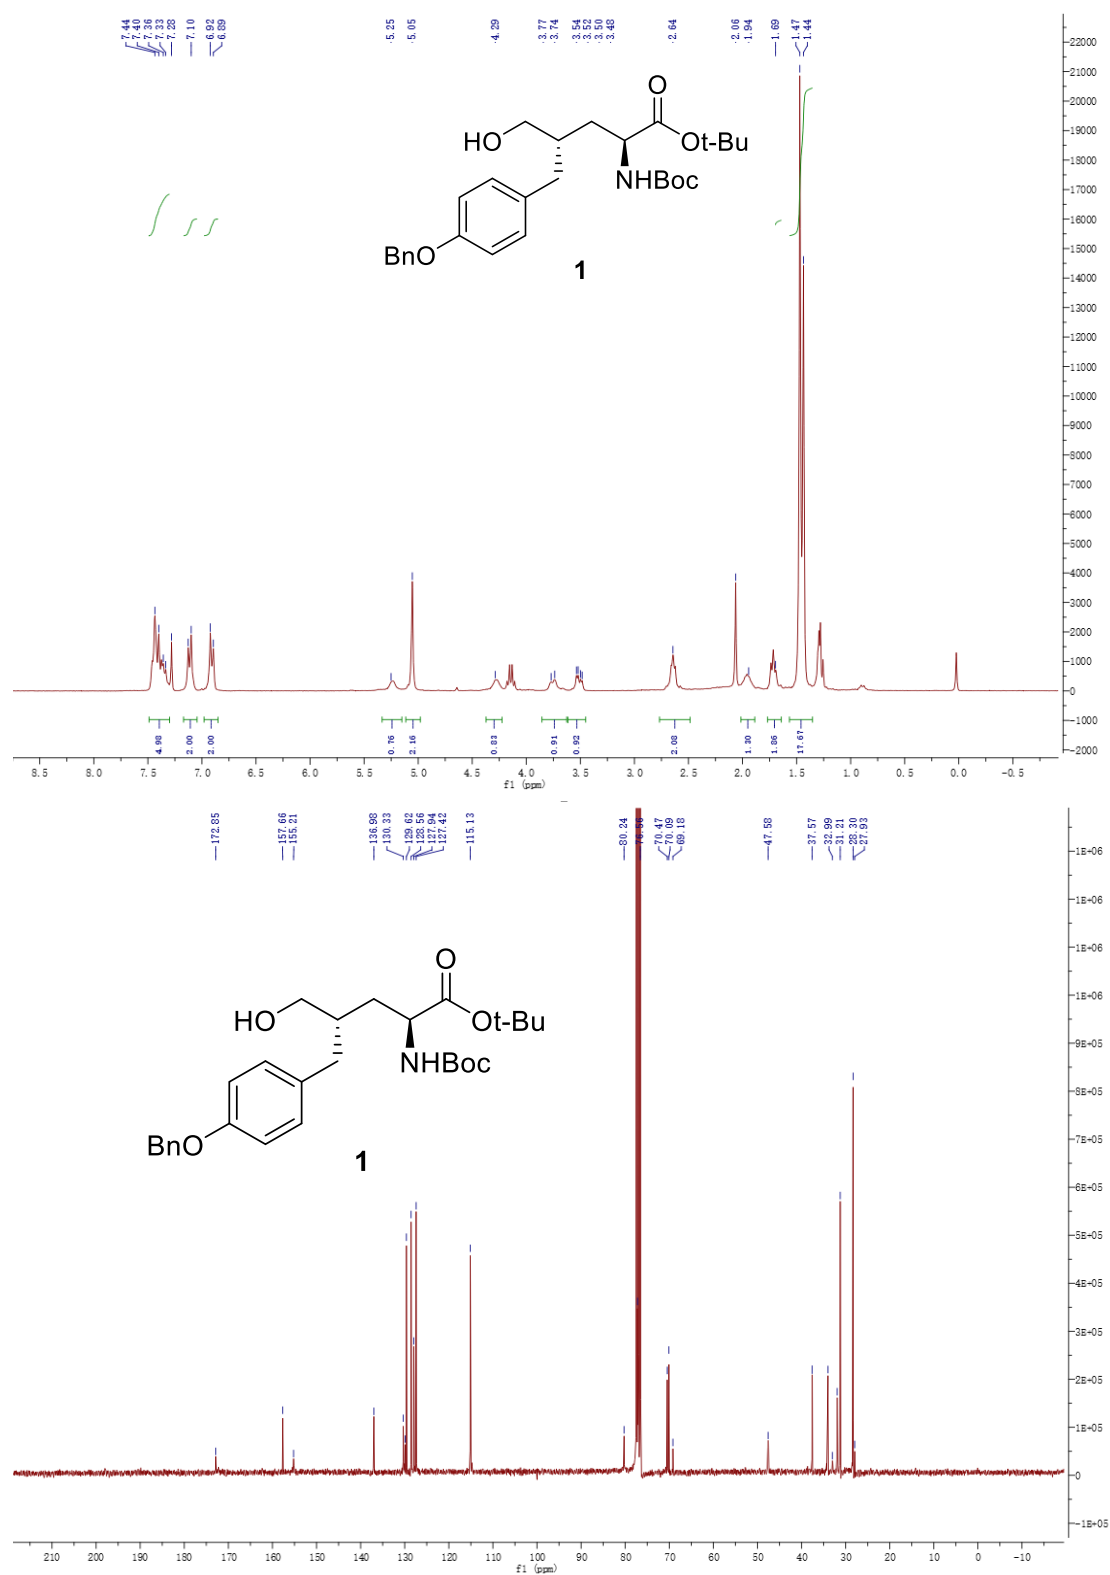

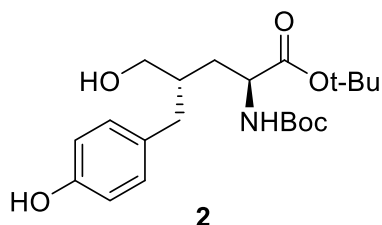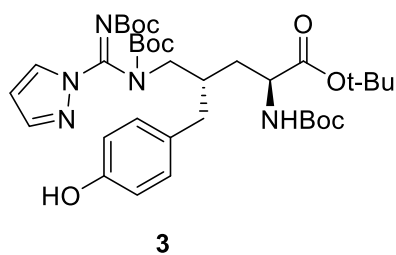

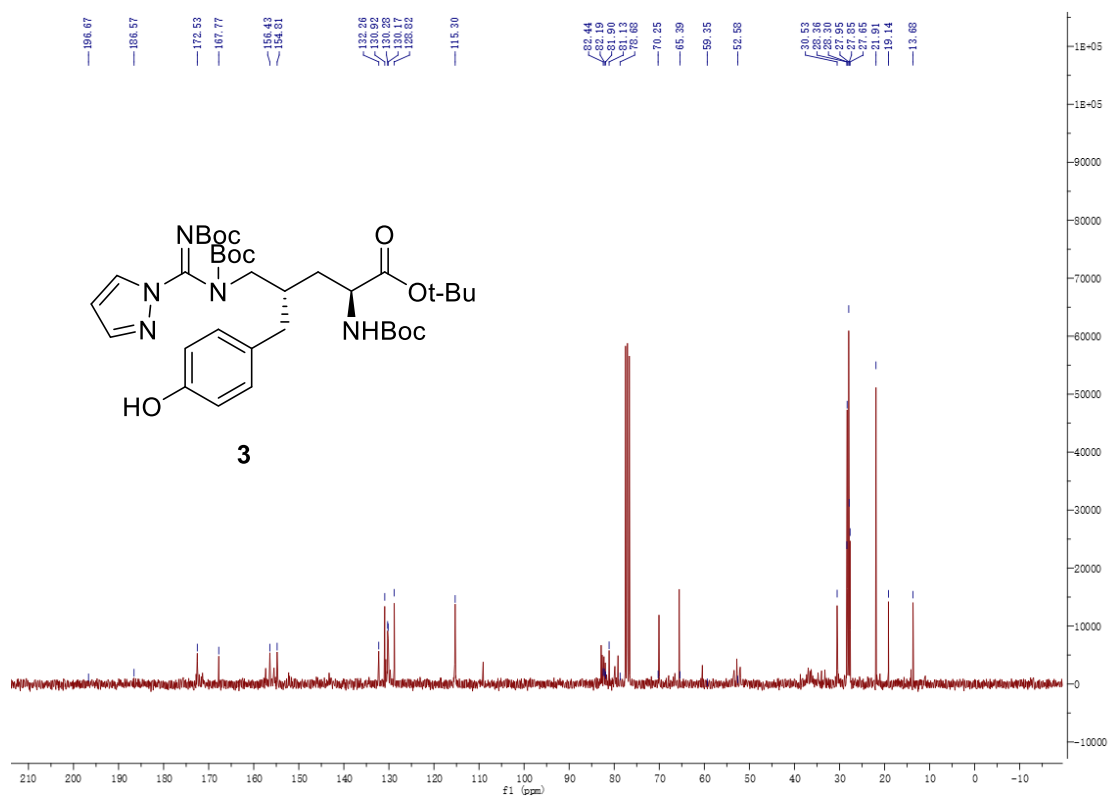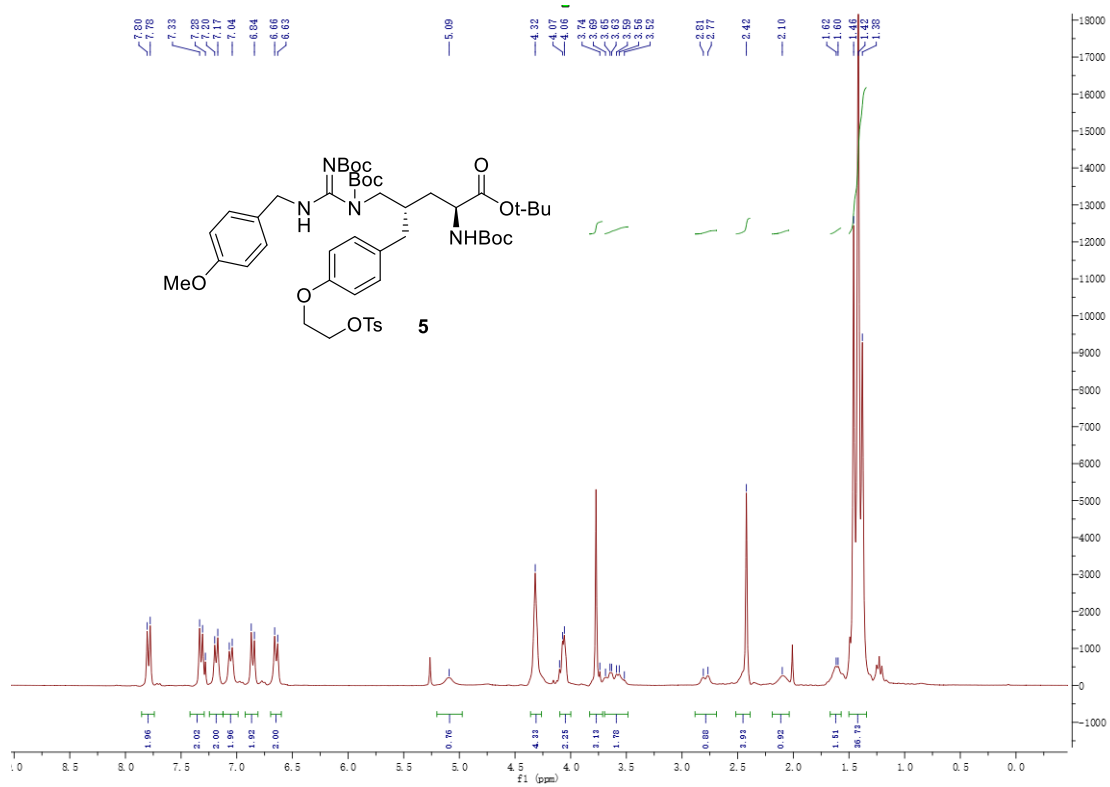

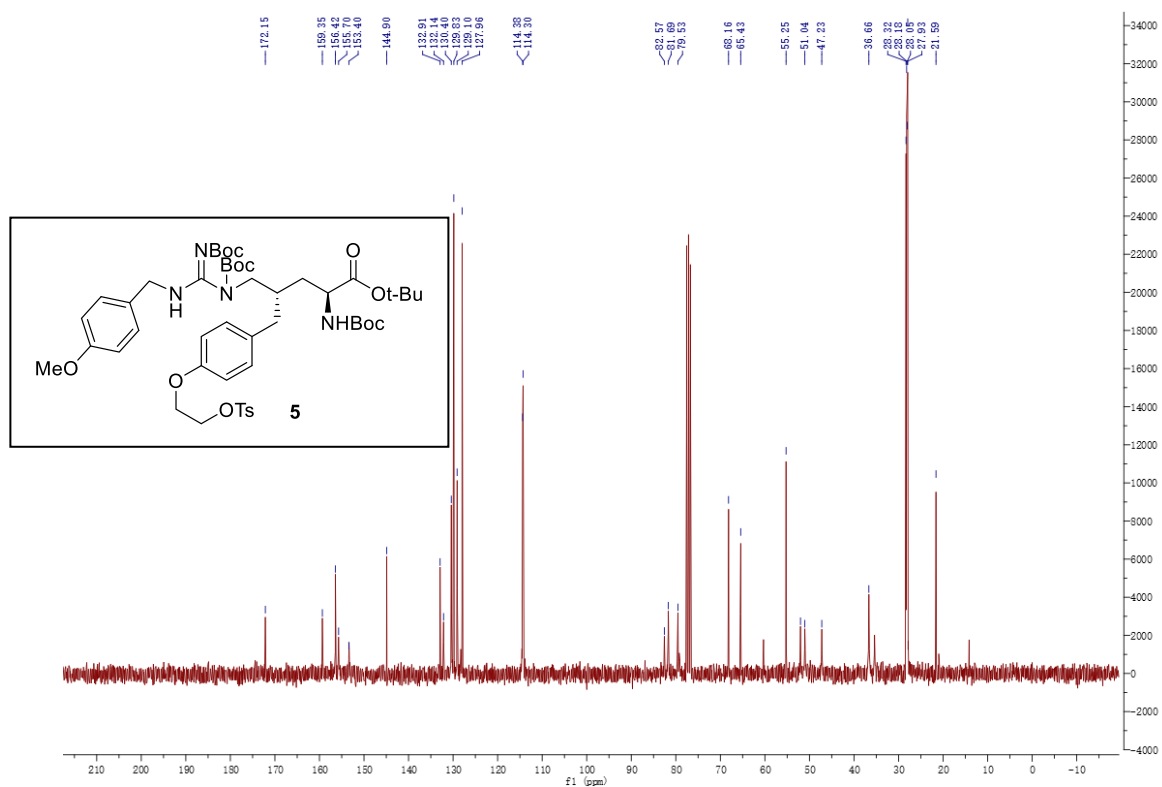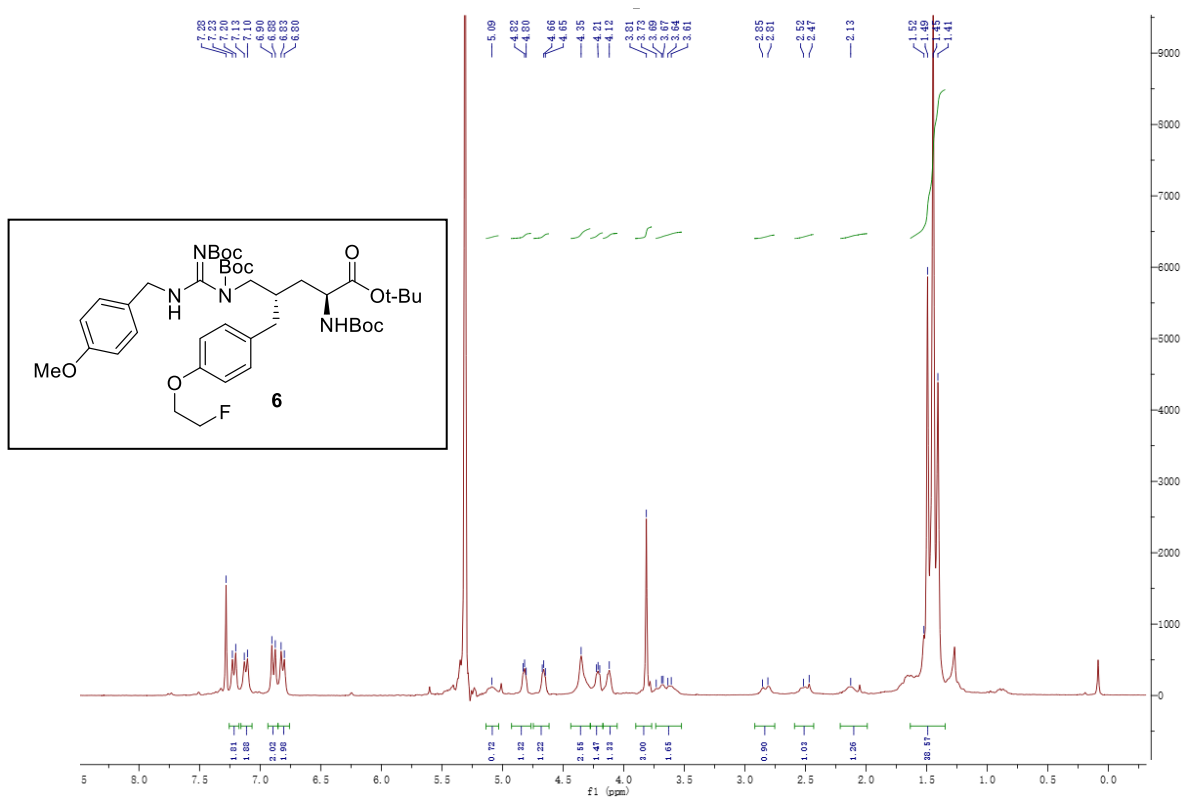

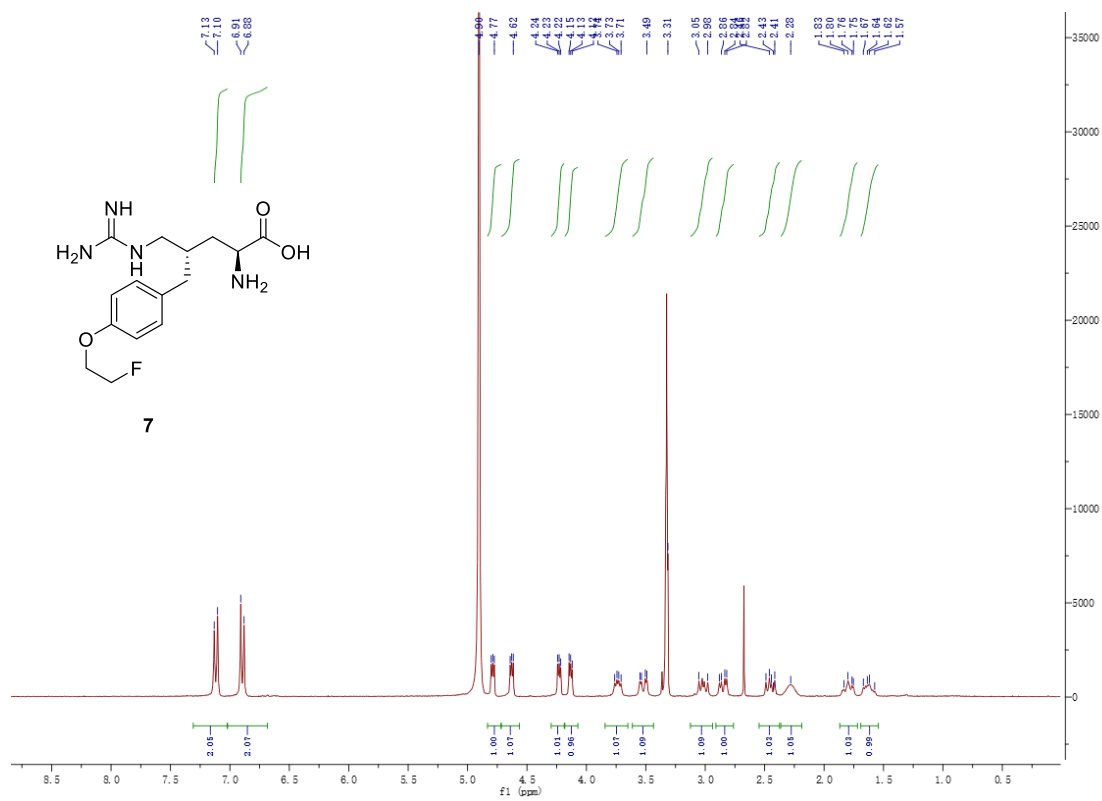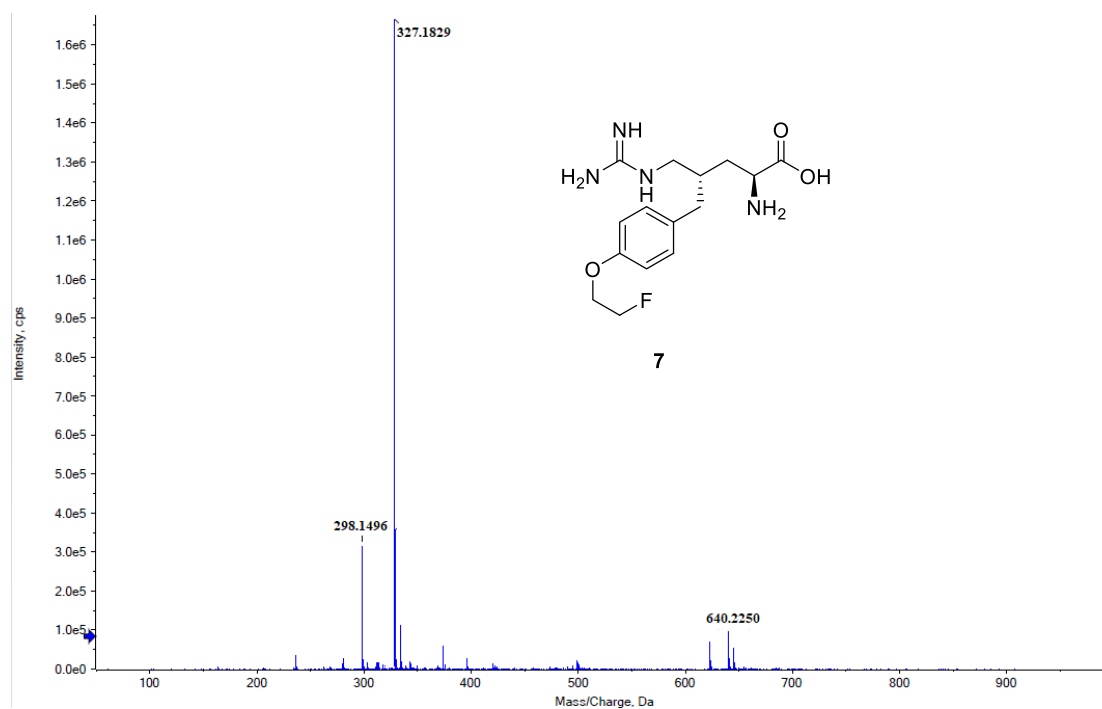

Supplement: s1 [file s1]
